# Supplementary material
Source: PubMed Central journal article supplement (PMC4826007)
Supplement: supp_tpc.15.00737_tpc00737_Supplemental.pdf [file supp_tpc.15.00737_tpc00737_Supplemental.pdf]

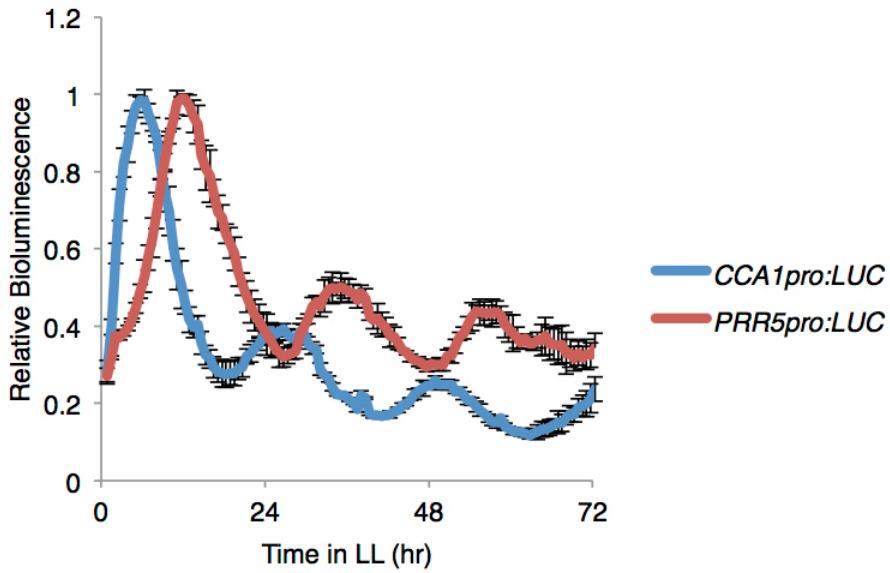

**Supplemental Figure 1. *PRR5* and *CCA1* promoter activities in *Arabidopsis* mesophyll protoplasts.**

Bioluminescence of the mesophyll protoplasts transfected with *CCA1pro:LUC* (blue) and *PRR5pro:LUC* (red) plasmid. Error bars are SD of three biological replicates.

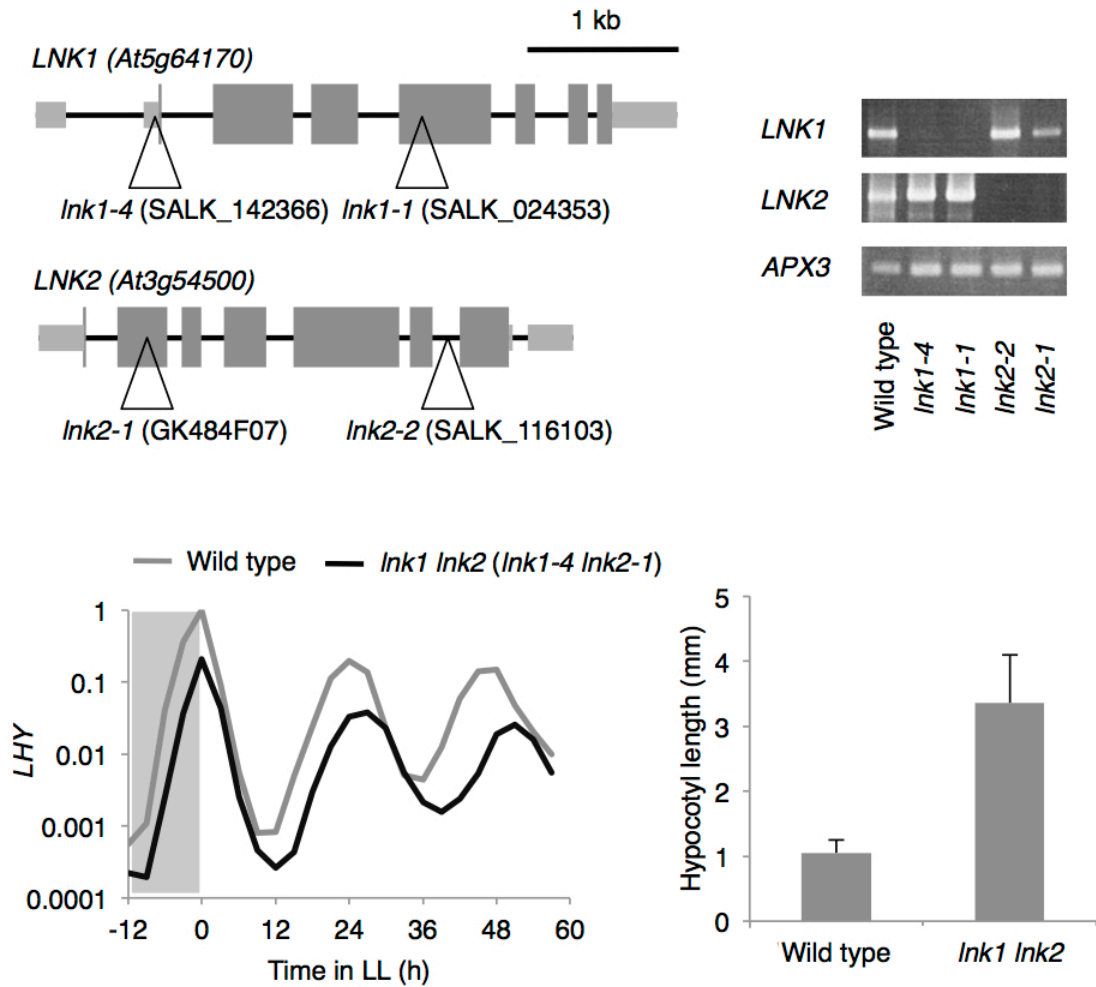

**Supplemental Figure 2. The *Ink1 Ink2* mutants used in this study.**

Schematic drawing of T-DNA insertions for *Ink1* and *Ink2* (upper left). Dark gray areas indicate exons of coding region, and right grays are un-translated regions. *LNK1* and *LNK2* expression in *Ink1* and *Ink2* T-DNA insertion lines (upper right). Full length of coding regions for *LNK1* and *LNK2*, and part of *APX3* coding region were amplified. *LHY* expression of the *Ink1 Ink2* double mutants (*Ink1-4 Ink2-1*) (lower left). Estimated period length in Wild-Type and *Ink1 Ink2* are 23.41 and 24.93, respectively. Hypocotyl length of *Ink1 Ink2* grown under 6 days of 12 h white light (70-80  $\mu\text{mol s}^{-1} \text{m}^{-2}$ ) / 12 h dark (n=15, error bars are SD) (lower right).

**CCA1-bound loci  
determined by  
IonPGM  
(FDR  $q < 10^{-20}$ )**

Supplemental Data Set 1A.

**CCA1-bound loci  
determined by Illumina  
GAII(FDR  $q < 10^{-20}$ )**

Supplemental Data Set 1B.

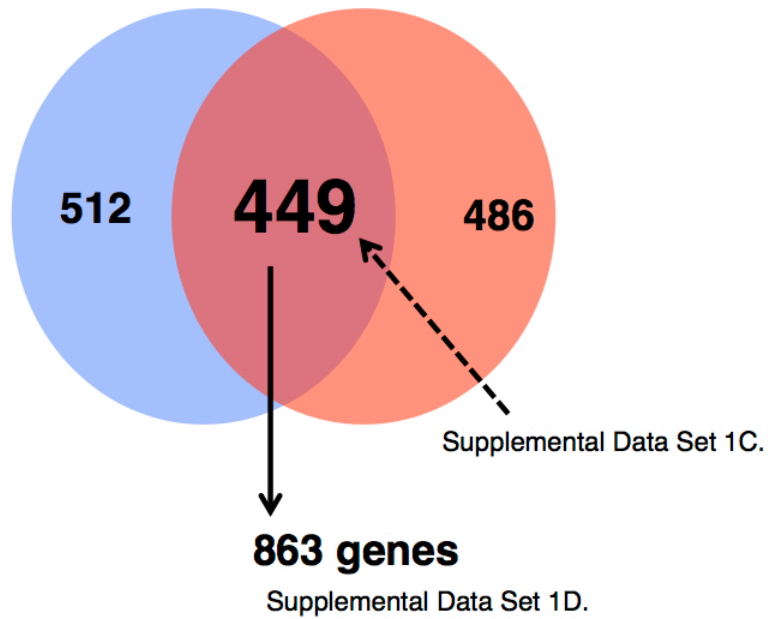

**Supplemental Figure 3. Overlap between CCA1-binding loci determined by IonPGM and Illumina GA II.**

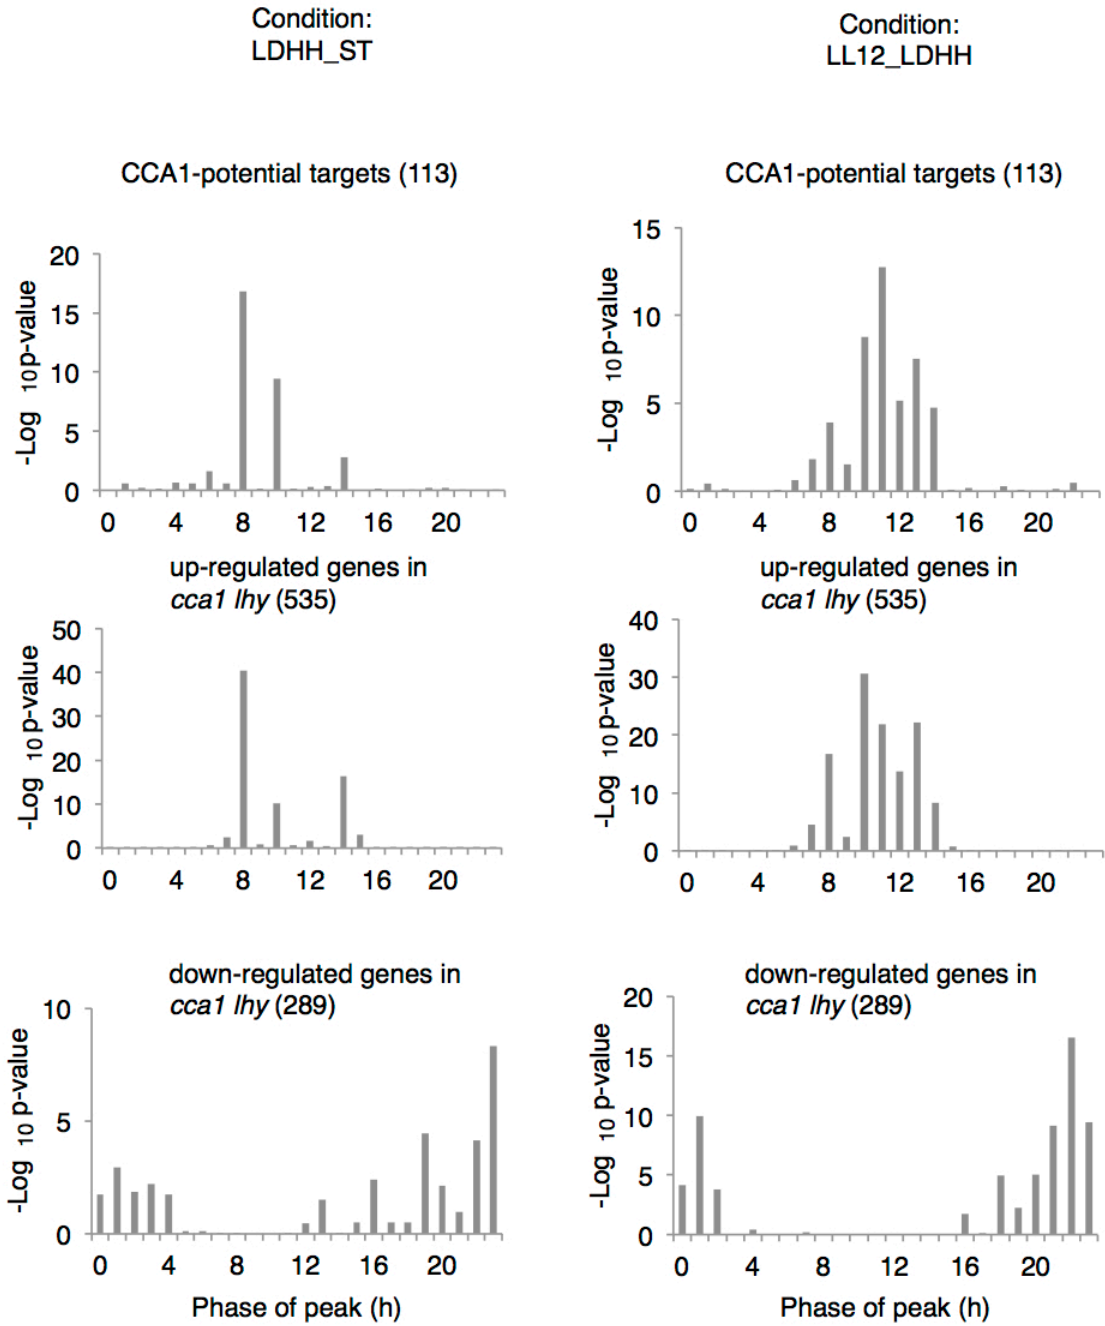

**Supplemental Figure 4. Peak-phase enrichment in the sets of 113 CCA1-potential target genes, 535 up-regulated genes in *cca1 lhy*, and 289 down-regulated genes in *cca1 lhy*.** Phase of peaks were determined by a web tool, Phaser (<http://phaser.mocklerlab.org/>), for 3 gene sets. Similar results were obtained under other LL condition (LL23\_LDHH) and LD condition (LDHH\_SM).

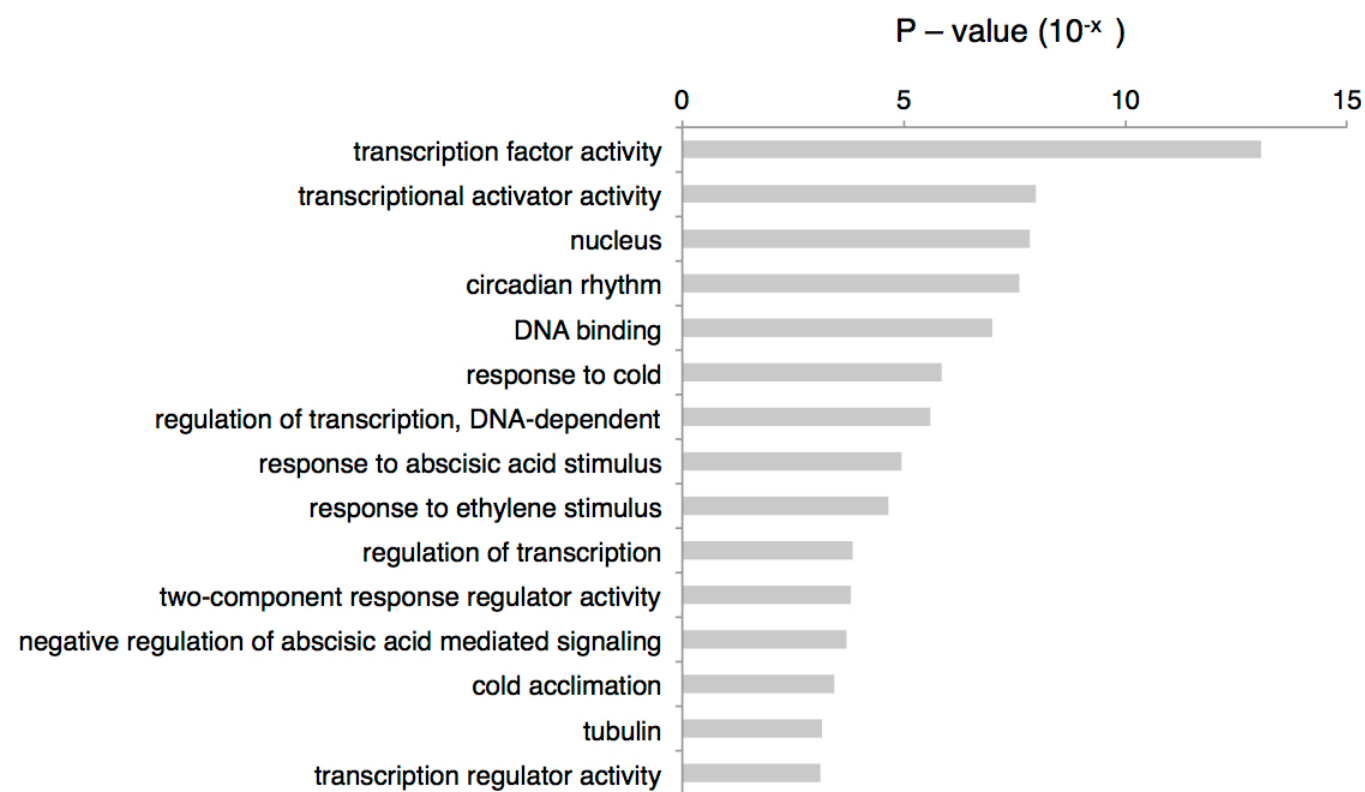

**Supplemental Figure 5. eGO analysis for CCA1-bound genes.**

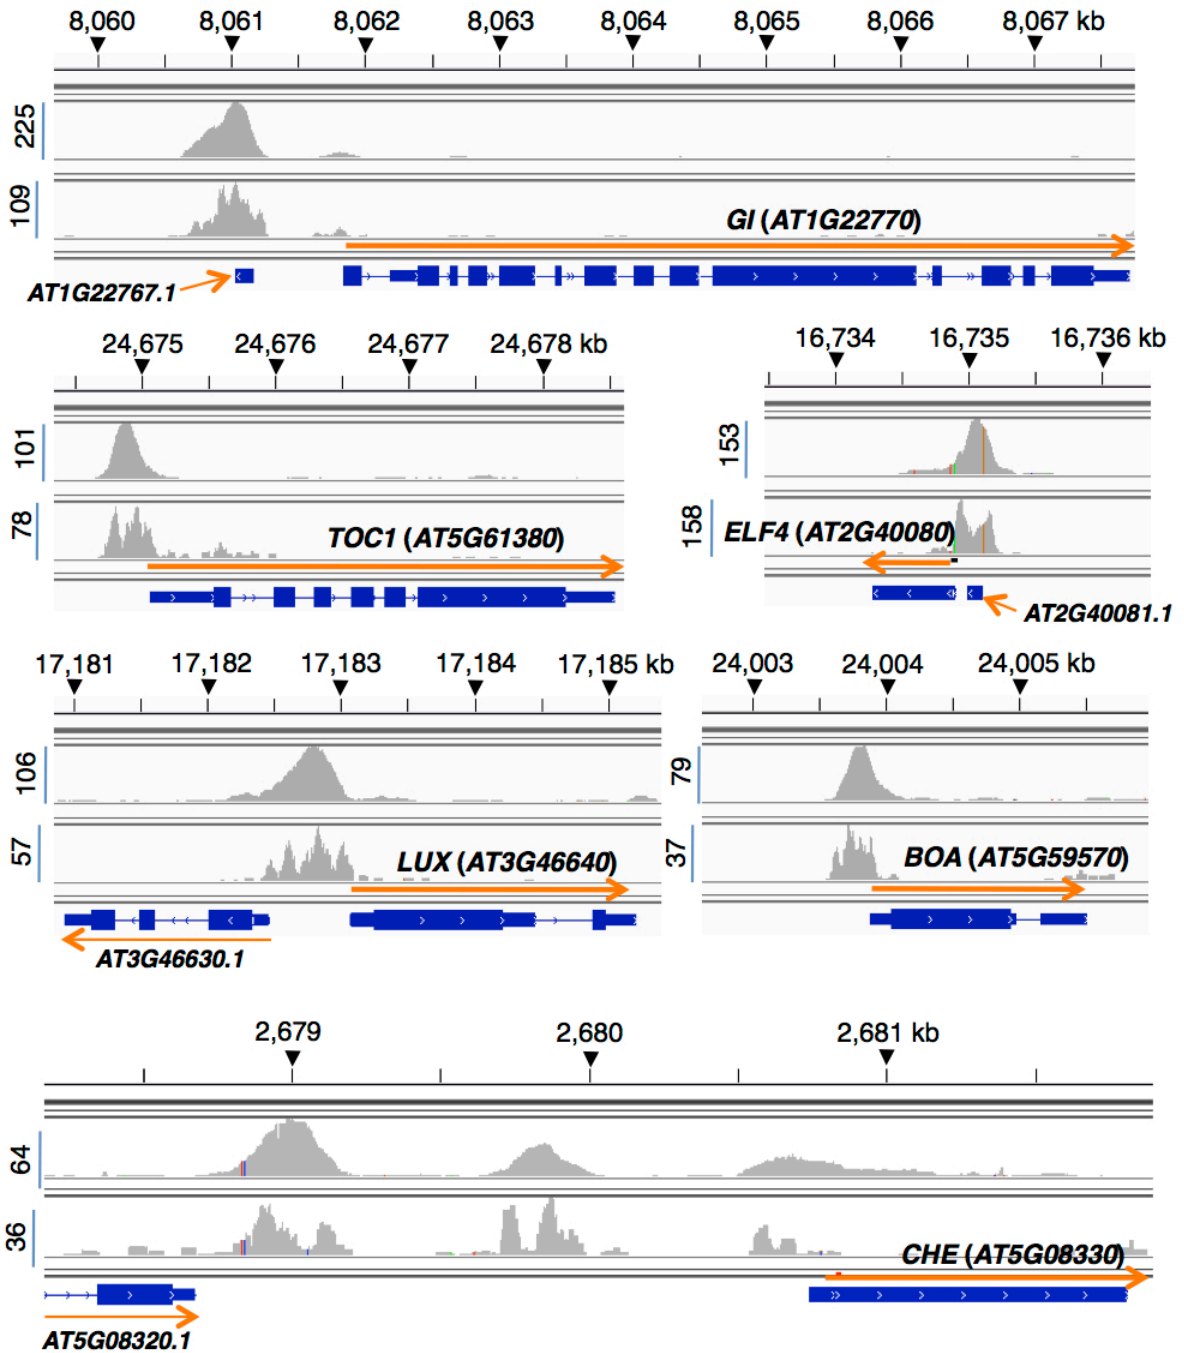

**Supplemental Figure 6. CCA1-binding profile around clock-associated genes.**

Upper and lower panels are mapping profile determined by IonPGM and GA II, respectively. Vertical bars indicate read counts. Horizontal numbers show base pairs.

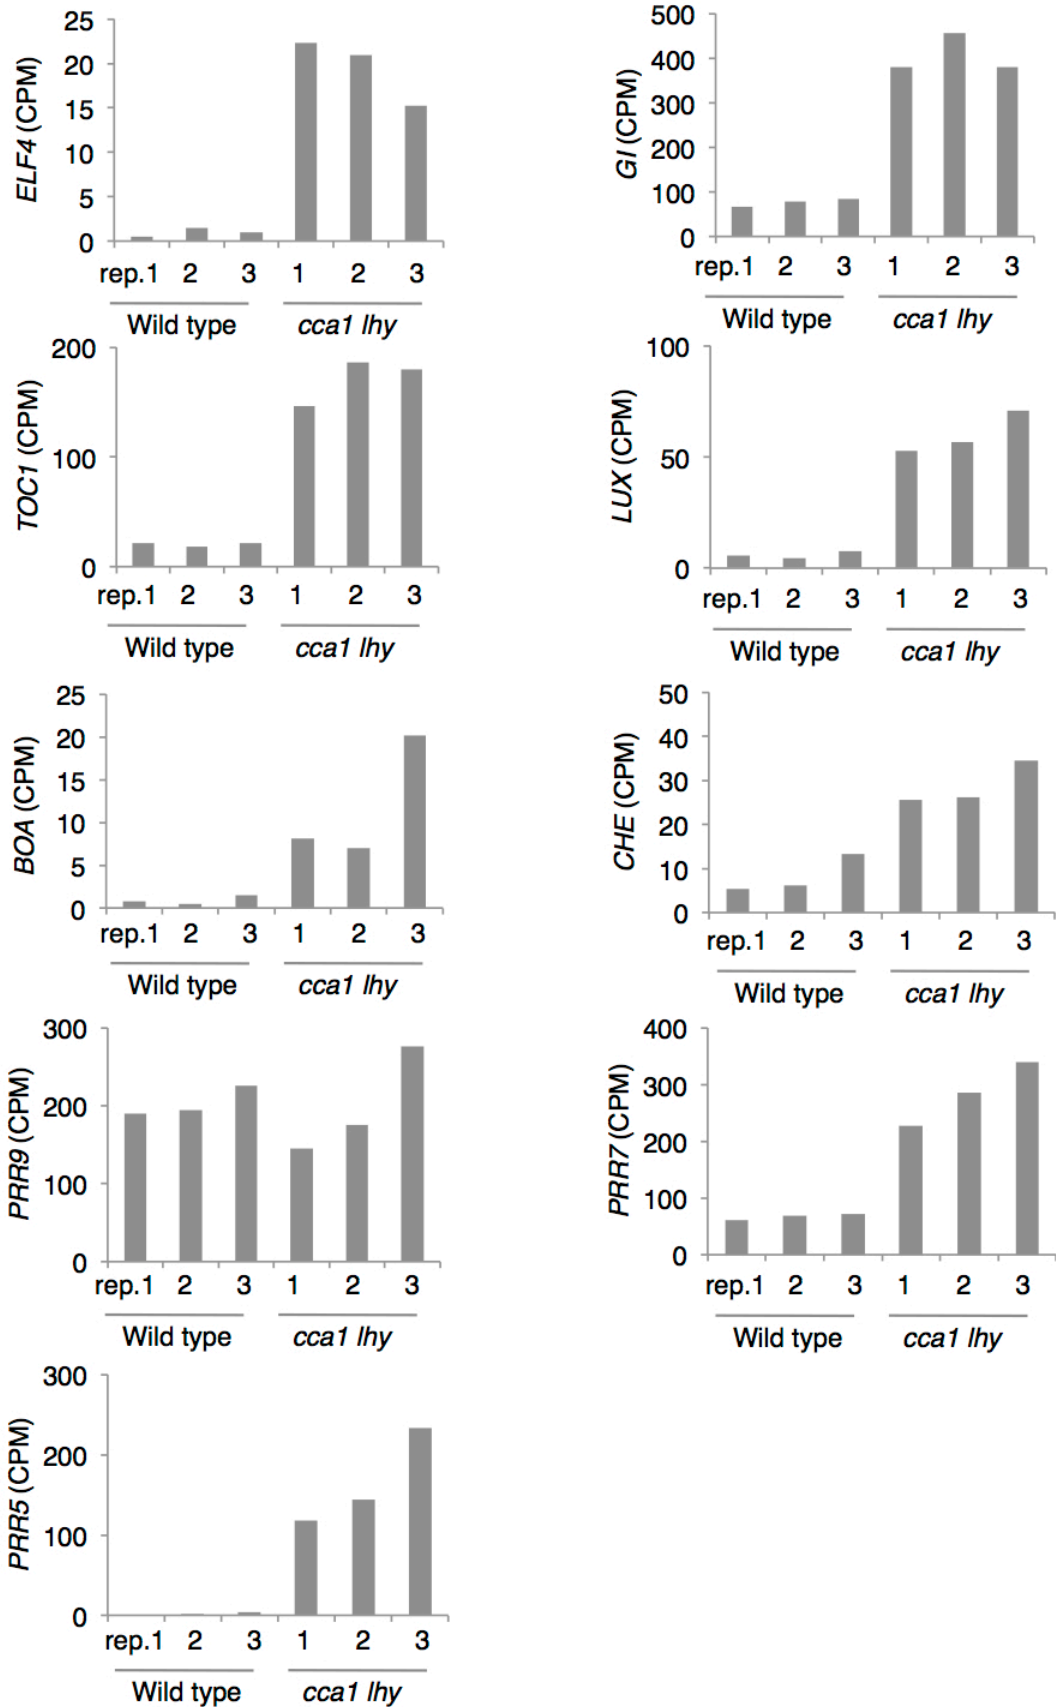

**Supplemental Figure 7. Expression of clock-associated genes in *cca1 lhy* at ZT1.**

These genes are also bound by CCA1. Except for *PRR9*, these genes expression are up-regulated in *cca1 lhy* (FDR  $q < 0.01$ ). CPM means counts per million.

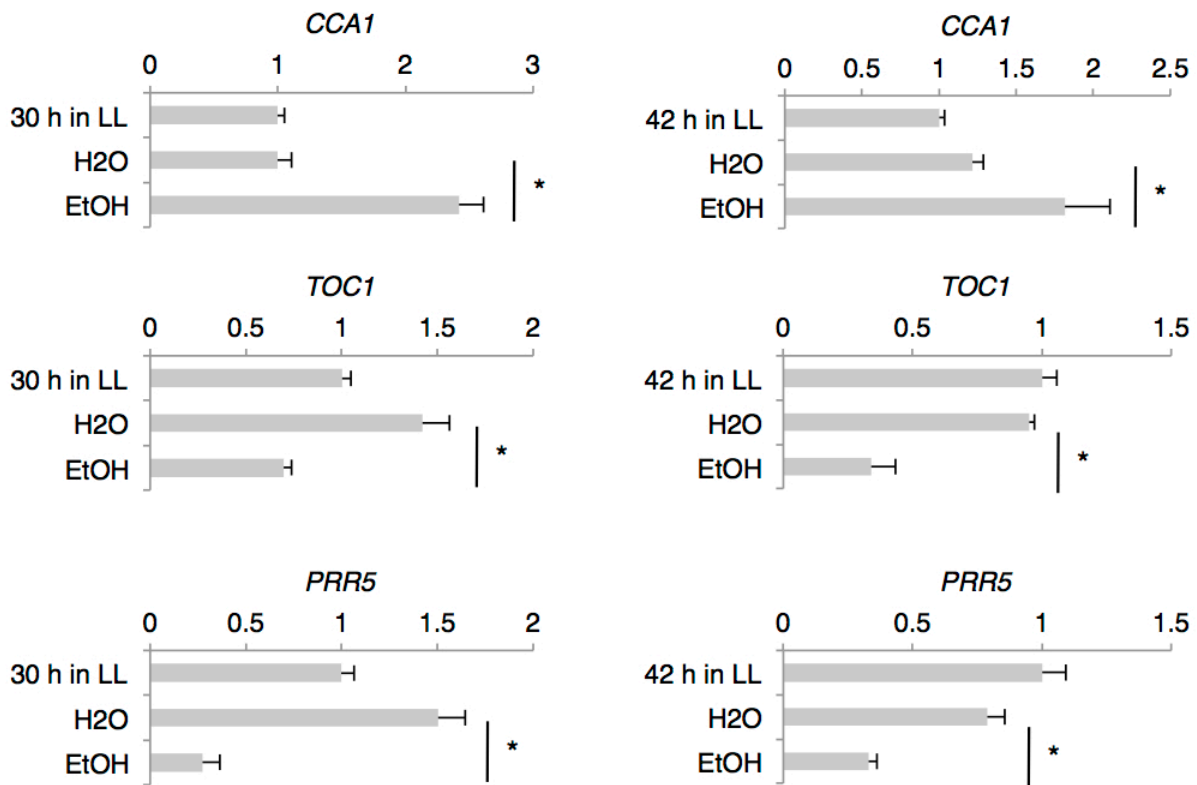

**Supplemental Figure 8. Expression of *CCA1*, *TOC1*, and *PRR5* upon ethanol induction in *Alc:CCA1*.**

Error bars indicate the SE of four biological replicates. Asterisks indicates a significant change between samples treated with ethanol (EtOH) and H<sub>2</sub>O (Student's t test; P < 0.05).



**Supplemental Table 1. Primers used in this study.**

| name             | sequence (5'-sequence-3')                    | purpose                              | plasmid               | E.coli/Agro selection | Plant selection | Target gene or locus              |
|------------------|----------------------------------------------|--------------------------------------|-----------------------|-----------------------|-----------------|-----------------------------------|
| gCCA1comp_F      | CACCGTCTTCTACCCCTCATGCATGG                   | CCA1pro:CCA1 cloning on pENTR/D-TOPO | pENTR/D-CCA1pro:CCA1  | Km                    |                 | CCA1 (At2g46830), genomic         |
| gCCA1comp_R      | TGTGGAAGCTTGAGTTTCCAAC                       | CCA1pro:CCA1 cloning on pENTR/D-TOPO | pENTR/D-CCA1pro:CCA1  | Km                    |                 | CCA1 (At2g46830), genomic         |
| M13 F            | GTAACACGACGGCCAGT                            | sequencing pENTR/D-CCA1pro:CCA1      |                       |                       |                 |                                   |
| M13 R            | CAGGAACAGCTATGAC                             | sequencing pENTR/D-CCA1pro:CCA1      |                       |                       |                 |                                   |
| CCA1pro300F      | TGATTACGCCAAGCTTAAAGTTTGAGGTTAAAG            | sequencing pENTR/D-CCA1pro:CCA1      |                       |                       |                 |                                   |
| CCA1_sygF        | GGTGGACTGAGGAAGAAC                           | sequencing pENTR/D-CCA1pro:CCA1      |                       |                       |                 |                                   |
| CCA1_compli_1.5F | CTTGTTGTCTTACCGATTG                          | sequencing pENTR/D-CCA1pro:CCA1      |                       |                       |                 |                                   |
| CCA1_compli_2.0F | GAAGATCGACAACAATCAAAGC                       | sequencing pENTR/D-CCA1pro:CCA1      |                       |                       |                 |                                   |
| CCA1_compli_2.5F | GTTGCAGCTGCTAGTGCTTG                         | sequencing pENTR/D-CCA1pro:CCA1      |                       |                       |                 |                                   |
| APX3proF         | CTCGTGTGCCGTTTTTTG                           | ChIP-qPCR                            | pBA-CCA1pro:CCA1-FLAG | Spec                  | Basta           | APX3 (At4g35000), upstream        |
| APX3proR         | GTCAAGGATGTGTGTGAAG                          | ChIP-qPCR                            |                       |                       |                 | APX3 (At4g35000), upstream        |
| PRR5_regionA_F   | GCAGACATTAGCCATTTATG                         | ChIP-qPCR                            |                       |                       |                 | PRR5 (At5g24470), regionA         |
| PRR5_regionA_R   | GGCCTAACCTACACTGAACATGC                      | ChIP-qPCR                            |                       |                       |                 | PRR5 (At5g24470), regionA         |
| PRR5_regionB_F   | CTCTGACAGTGACAGCTAC                          | ChIP-qPCR                            |                       |                       |                 | PRR5 (At5g24470), regionB         |
| PRR5_regionB_R   | GAGTAGGGACAAAGGGTGATG                        | ChIP-qPCR                            |                       |                       |                 | PRR5 (At5g24470), regionB         |
| PRR5_regionC_F   | GCTGATGTGGCAAACGTGG                          | ChIP-qPCR                            |                       |                       |                 | PRR5 (At5g24470), regionC         |
| PRR5_regionC_R   | GAGAGATAAATGAGAAGAGAGC                       | ChIP-qPCR                            |                       |                       |                 | PRR5 (At5g24470), regionC         |
| PRR5_ods_F       | GCCGCTTAAACCAATTCGG                          | ChIP-qPCR                            |                       |                       |                 | PRR5 (At5g24470), coding sequence |
| PRR5_ods_R       | CGAATTGGCCTTTGATTCGTG                        | ChIP-qPCR                            |                       |                       |                 | PRR5 (At5g24470), coding sequence |
| IPP2sygF         | GAGACGTCTCATGTTTGAGGATG                      | RT-qPCR                              |                       |                       |                 | IPP2 (At3g02780)                  |
| IPP2sygR         | GGAGAAGCAACTCATACTTCGAG                      | RT-qPCR                              |                       |                       |                 | IPP2 (At3g02780)                  |
| PRR5sygF         | CTTCATCCTTCTAGTGCC                           | RT-qPCR                              |                       |                       |                 | PRR5 (At5g24470)                  |
| PRR5sygR         | GTCGTTTCTTCTGGAGC                            | RT-qPCR                              |                       |                       |                 | PRR5 (At5g24470)                  |
| PRR7sygF         | CTGCACCTCGTTATATCGTACTG                      | RT-qPCR                              |                       |                       |                 | PRR7 (At5g02810)                  |
| PRR7sygR         | GGCATGATCACCTCTGTAG                          | RT-qPCR                              |                       |                       |                 | PRR7 (At5g02810)                  |
| PRR9sygF         | CCAATGAGGAAAACGAG                            | RT-qPCR                              |                       |                       |                 | PRR9 (At2g46790)                  |
| PRR9sygR         | GCACCACTTCCTTGATCTG                          | RT-qPCR                              |                       |                       |                 | PRR9 (At2g46790)                  |
| CCA1sygF         | GGTGGACTGAGGAAGAAC                           | RT-qPCR                              |                       |                       |                 | CCA1 (At2g46830)                  |
| CCA1sygR         | GGAGAAAAATTTCTGAGCGTGAC                      | RT-qPCR                              |                       |                       |                 | CCA1 (At2g46830)                  |
| TOC1sygF         | CTCTCGTTTCAGAGTGTCTTATC                      | RT-qPCR                              |                       |                       |                 | TOC1 (At5g61380)                  |
| TOC1sygR         | CACAGGGATTCTGCGAAG                           | RT-qPCR                              |                       |                       |                 | TOC1 (At5g61380)                  |
| LHYsygF          | CGCGGTTCAAGATGTTCC                           | RT-qPCR                              |                       |                       |                 | LHY (At1g01060)                   |
| LHYsygR          | GAACATGAAGTCTTGAGATACC                       | RT-qPCR                              |                       |                       |                 | LHY (At1g01060)                   |
| APX3sygF         | CTCCGTTCTCTCATCGC                            | RT-PCR                               |                       |                       |                 | APX3 (At4g35000)                  |
| APX3sygR         | CAGAGATCGAGAGCCGATC                          | RT-PCR                               |                       |                       |                 | APX3 (At4g35000)                  |
| LNK1_topF        | CACCATGTGGCACTTGTACATTCATGAG                 | RT-PCR                               |                       |                       |                 | LNK1 (At5g64170)                  |
| LNK1_topR(+ter)  | TTAATTGTTGTCACTTGTTACAACCTTC                 | RT-PCR                               |                       |                       |                 | LNK1 (At5g64170)                  |
| LNK2_F           | CACCATGTTTGTGGAAAGCTTGAAGTTCACAAC            | RT-PCR                               |                       |                       |                 | LNK2 (At3g54500)                  |
| LNK2_R           | CAATTTCCTTTTCTTCTGGGATG                      | RT-PCR                               |                       |                       |                 | LNK2 (At3g54500)                  |
| CCA1_XbaI_F      | GACTCTAGAATGGAGACAAATTCGTGGAG                | CCA1 cloning on pBS-FLAG             | pBS-35Spro:CCA1-FLAG  | Amp                   |                 | CCA1 (At2g46830)                  |
| CCA1_BamHI_R     | CGGGGATCCTTTGTGGAAAGCTTGAAGTTCACAAC          | CCA1 cloning on pBS-FLAG             | pBS-35Spro:CCA1-FLAG  | Amp                   |                 | CCA1 (At2g46830)                  |
| LHY_BamHI_F      | ATCGGATCCTATGGATACTAATACATCTGGAGAAGAATTATTAG | LHY cloning on pBS-FLAG              | pBS-35Spro:LHY-FLAG   | Amp                   |                 | LHY (At1g01060)                   |
| LHY_NcoI_R       | GATCCATGGATGTAGAAGCTTCTCCTTCC                | LHY cloning on pBS-FLAG              | pBS-35Spro:LHY-FLAG   | Amp                   |                 | LHY (At1g01060)                   |
| LNK1_topF        | CACCATGTGGCACTTGTACATTCATGAG                 | LNK1 cloning on pENTR/D-TOPO         | pENTR/D-LNK1+ter      | Km                    |                 | LNK1 (At5g64170)                  |
| LNK1_topR(+ter)  | TTAATTGTTGTCACTTGTTACAACCTTC                 | LNK1 cloning on pENTR/D-TOPO         | pENTR/D-LNK1+ter      | Km                    |                 | LNK1 (At5g64170)                  |
| PRR5pro_0_F      | ACGCCAAGCTAAGCTCTCTGACAGTGACAGCTACC          | PRR5pro (1) cloning on pSP-luc+      | pSP-PRR5pro (1):LUC   | Amp                   |                 | PRR5 (At5g24470), upstream        |
| PRR5pro_1.4_R    | GAAGGGTCTTGGGATCACAACACAACACTTAGCTTTG        | PRR5pro (1) cloning on pSP-luc+      | pSP-PRR5pro (1):LUC   | Amp                   | Hyg             | PRR5 (At5g24470), upstream        |
| PRR5pro_0_F      | ACGCCAAGCTAAGCTCTCTGACAGTGACAGCTACC          | PRR5pro (2) cloning on pSP-luc+      | pSP-PRR5pro (2):LUC   | Amp                   |                 | PRR5 (At5g24470), upstream        |
| PRR5pro_0.7_R    | GAAGGGTCTTGGGATCCTTTGGGATAATACCAAAACCC       | PRR5pro (2) cloning on pSP-luc+      | pSP-PRR5pro (2):LUC   | Amp                   | Hyg             | PRR5 (At5g24470), upstream        |
| PRR5pro_0.4_F    | ACGCCAAGCTAAGCTTCCAAAAGTCACGAGTGGG           | PRR5pro (3) cloning on pSP-luc+      | pSP-PRR5pro (3):LUC   | Amp                   |                 | PRR5 (At5g24470), upstream        |
| PRR5pro_1.0_R    | GAAGGGTCTTGGGATCCTTCAATACGCCAAATAACCTTC      | PRR5pro (3) cloning on pSP-luc+      | pSP-PRR5pro (3):LUC   | Amp                   | Hyg             | PRR5 (At5g24470), upstream        |
| PRR5pro_0.7_F    | ACGCCAAGCTAAGCTTCCAAAAGTCACGAGTGGG           | PRR5pro (4) cloning on pSP-luc+      | pSP-PRR5pro (4):LUC   | Amp                   |                 | PRR5 (At5g24470), upstream        |
| PRR5pro_1.4_R    | GAAGGGTCTTGGGATCACAACACAACACTTAGCTTTG        | PRR5pro (4) cloning on pSP-luc+      | pSP-PRR5pro (4):LUC   | Amp                   | Hyg             | PRR5 (At5g24470), upstream        |
| PRR5pro_1.0_F    | ACGCCAAGCTAAGCTTCCAAAAGTCACGAGTGGG           | PRR5pro (5) cloning on pSP-luc+      | pSP-PRR5pro (5):LUC   | Amp                   |                 | PRR5 (At5g24470), upstream        |
| PRR5pro_1.4_R    | GAAGGGTCTTGGGATCACAACACAACACTTAGCTTTG        | PRR5pro (5) cloning on pSP-luc+      | pSP-PRR5pro (5):LUC   | Amp                   | Hyg             | PRR5 (At5g24470), upstream        |
| PRR7pro_F        | CTTAAAGCTTGAATGGCCCATATGTAAGC                | PRR7 cloning on pSP-luc+             | pSP-PRR7pro:LUC       | Amp                   |                 | PRR7 (At5g02810), upstream        |
| PRR7pro_R        | TTAAGGCATGGTACACCAACTCTGCTTCG                | PRR7 cloning on pSP-luc+             | pSP-PRR7pro:LUC       | Amp                   |                 | PRR7 (At5g02810), upstream        |
| PRR9pro_F        | TGATTACGCCAAGCTTCCGCGCCACTAACGAAATTTG        | PRR9 cloning on pSP-luc+             | pSP-PRR9pro:LUC       | Amp                   |                 | PRR9 (At2g46790), upstream        |
| PRR9pro_R        | TTGGCGTCTTCCATGGCCCATAGACTCAGACC             | PRR9 cloning on pSP-luc+             | pSP-PRR9pro:LUC       | Amp                   |                 | PRR9 (At2g46790), upstream        |
